RESEARCH ARTICLE

# Efficacy and Safety of Sorafenib Therapy on Metastatic Renal Cell Carcinoma in Korean Patients: Results from a Retrospective Multicenter Study

Sung Han Kim<sup>1</sup>, Sohee Kim<sup>2</sup>, Byung-Ho Nam<sup>2</sup>, Sang Eun Lee<sup>3</sup>, Choung Soo Kim<sup>4</sup>, Ill Young Seo<sup>5</sup>, Tae Nam Kim<sup>6</sup>, Sung-Hoo Hong<sup>7</sup>, Tae Gyun Kwon<sup>8</sup>, Seong Il Seo<sup>9</sup>, Kwan Joong Joo<sup>10</sup>, Kanghyon Song<sup>11</sup>, Cheol Kwak<sup>12</sup>, Jinsoo Chung<sup>1\*</sup>

**1** Departments of Urology, Center for Prostate Cancer, National Cancer Center, Goyang, Korea, **2** Biometric Research Branch, Center for Prostate Cancer, National Cancer Center, Goyang, Korea, **3** Seoul National University Bundang Hospital, SeongNam, Korea, **4** Asan Medical Center, Seoul, Korea, **5** Samsung Medical Center, Sungkyunkwan University School of Medicine, Seoul, Korea, **6** Pusan National University Hospital, Busan, Korea, **7** Seoul St. Mary's Hospital, Seoul, Korea, **8** School of Medicine, Kyungpook National University, Daegu, Korea, **9** Wonkwang University School of Medicine and Hospital, Iksan, Korea, **10** Kangbuk Samsung Hospital, Sungkyunkwan University School of Medicine, Seoul, Korea, **11** Korea Cancer Center Hospital, Seoul, Korea, **12** Seoul National University Hospital, Seoul, Korea

\* [cjs5225@ncc.re.kr](mailto:cjs5225@ncc.re.kr)

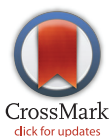

**OPEN ACCESS**

**Citation:** Kim SH, Kim S, Nam B-H, Lee SE, Kim CS, Seo IY, et al. (2015) Efficacy and Safety of Sorafenib Therapy on Metastatic Renal Cell Carcinoma in Korean Patients: Results from a Retrospective Multicenter Study. PLoS ONE 10(8): e0135165. doi:10.1371/journal.pone.0135165

**Editor:** Jung Weon Lee, Seoul National University, REPUBLIC OF KOREA

**Received:** April 6, 2015

**Accepted:** July 18, 2015

**Published:** August 26, 2015

**Copyright:** © 2015 Kim et al. This is an open access article distributed under the terms of the [Creative Commons Attribution License](https://creativecommons.org/licenses/by/4.0/), which permits unrestricted use, distribution, and reproduction in any medium, provided the original author and source are credited.

**Data Availability Statement:** Because of an ethical restriction, all data underlying the findings in this study are freely available upon request only. If readers require access to the data, please send an e-mail to the corresponding author, Dr. Jinsoo Chung ([cjs5225@ncc.re.kr](mailto:cjs5225@ncc.re.kr)), as all information of the enrolled patients is stored in an institutional database that is strictly regulated, under the guidance of the authors' institutional review board.

**Funding:** This investigator-initiated research was supported with funding by a grant from Bayer Healthcare Pharmaceuticals, Korea (Grant No. Asan

## Abstract

### Objective

To evaluate the efficacy and safety of sorafenib for Korean patients with metastatic renal cell carcinoma (mRCC).

### Methods

A total of 177 mRCC patients using sorafenib as first- (N = 116), second- (N = 43), and third-line (N = 18) therapies were enrolled from 11 Korean centers between 2006 and 2012. The patient characteristics, therapy duration, tumor response, disease control rate, and tolerability were assessed at baseline and at routine follow-ups, and the progression-free survival (PFS) and overall survival (OS) times and rates were analyzed.

### Results

Among all patients, 18 (10.2%) stopped sorafenib treatment for a median of 1.7 weeks, including 15 (8.5%) who discontinued the drug, while 40 (22.6%) and 12 (6.8%) patients required dose reductions and drug interruptions, respectively. Severe adverse events (AEs) or poor compliance was observed in 64 (36.2%) patients, with 118 (7.4%)  $\geq$  grade 3 AEs. During the treatment, one myocardial infarction was observed. The number of  $\geq$  grade 3 AEs in the first-line sorafenib group was 71 (6.8% of the total 1048 AEs). During a median follow-up of 17.2 months, the radiologically confirmed best objective response rate, disease control rate, median PFS, and median OS were 22.0%, 53.0%, 6.4 months (95% confidence

2012-09). The funders had no role in study design, data collection and analysis, decision to publish, or preparation of the manuscript. Co-author Ill Young Seo is employed by Samsung Medical Center. Co-author Kwan Joong Joo is employed by Kangbuk Samsung Hospital. Samsung Medical Center and Kangbuk Samsung Hospital provided support in the form of salaries for authors IYS and KJJ, but did not have any additional role in the study design, data collection and analysis, decision to publish, or preparation of the manuscript. The specific roles of these authors are articulated in the 'author contributions' section.

**Competing Interests:** This investigator-initiated research was supported with funding by a grant from Bayer Healthcare Pharmaceuticals. Co-author Ill Young Seo is employed by Samsung Medical Center. Co-author Kwan Joong Joo is employed by Kangbuk Samsung Hospital. The corresponding author (Dr. Jinsoo Chung) and one of the co-author named Dr Choung-Soo Kim have acted as consultants for Pfizer, Bristol-Myers Squibb, and Taiho, and have received advisory and/or speaker fees from Bayer, Bristol-Myers Squibb, and Taiho. There are no patents, products in development or marketed products to declare. This does not alter the authors' adherence to all the PLOS ONE policies on sharing data and materials. The other authors declare that they do not have anything to disclose regarding funding or conflicts of interests with respect to this manuscript.

interval [CI], 5.2–8.9), and 32.6 months (95% CI, 27.3–63.8) for the total 177 sorafenib-treated patients, respectively, and 23.2%, 56.0%, 7.4 months (95% CI, 5.5–10.5), and not reached yet (95% CI, 1.0–31.1) for the first-line sorafenib group, respectively.

## Conclusions

Sorafenib produced tolerable safety, with a  $\geq$ grade 3 AE rate of 7.4% and an acceptable disease control rate (53.0%) in Korean mRCC patients.

## Introduction

Until the early 2000s, which saw the advent of targeted therapy (TT), metastatic renal cell carcinoma (mRCC) was considered a dismal disease, owing to its high resistance to chemotherapy and poor responses (<20%) to cytokine therapy, the first-line systemic therapy for mRCC patients at that time [1]. Moreover, many patients were unable to receive cytokine therapy, particularly interleukin-2, due to toxicity, resulting in 5-year overall survival (OS) rates of only 10–22% [2].

After the introduction of several new agents, the standard first-line treatment for advanced RCC has shifted to TT. Among the TTs, sorafenib (Nexavar, Bayer Healthcare Pharmaceuticals, Wayne, NJ, USA, and Onyx Pharmaceuticals, South San Francisco, CA, USA) is a multi-targeted tyrosine kinase inhibitor against the vascular endothelial growth factor and platelet-derived growth factor receptors, Fms-like tyrosine kinase 3, ret proto-oncogene, proto-oncogene c-kit, and the raf serine/threonine kinases B-RAF and C-RAF [3]. The efficacy of sorafenib in RCC has been confirmed in many trials from different countries, and sorafenib is now available worldwide for the treatment of advanced RCC [3–10].

In Korea, 3 years after the US Food and Drug Administration approved sorafenib in December 2005 for RCC, the Ministry of Food and Drug Safety approved it as a first-line treatment for advanced RCC. Until then, immunochemotherapy had been widely used, with disappointing outcomes, and no standard treatment existed for immunochemotherapy-refractory patients.

Nowadays, with the satisfied efficacy and safety outcomes of first-line sorafenib, several comparative studies have reported the efficacy of sorafenib as second- and third-line TT in failed mRCC patients to prior TTs [11–14]. However, few studies have examined its effectiveness and safety in Asian ethnic patients, especially Koreans [8, 13, 15, 16], and there is currently no multicenter study investigating the efficacy of sorafenib in Korea.

Therefore, this study, comprising mRCC clinical data from 11 academic Korean centers, aimed to evaluate the safety and efficacy, including the therapeutic responses, of sorafenib as first-, second-, and third-line treatments.

## Material and Methods

Clinically diagnosed mRCC patients (N = 184) from 11 Korean academic hospitals, treated with sorafenib as TT with/without prior systemic therapy between 2006 and 2012, were retrospectively reviewed. After excluding patients aged <18 years and with a life expectancy <3 months, 177 patients were enrolled, including 116 (65.5%), 43 (24.3%), and 18 (10.2%) patients treated with sorafenib as first-, second-, and third-line TT, respectively. RCC was pathologically confirmed from the primary or metastatic site(s) by nephrectomy, metastasectomy, or

tumor biopsies, and the tumors were staged according to the 2009 American Joint Committee on Cancer classification as stage IV.

Sorafenib was administered based on the treatment recommendation by the US Food and Drug Administration for mRCC, starting with 400 mg orally twice daily, at 12-hour intervals, on a continuous basis [3, 17]. Dose modification to 400 mg once daily was permitted based on the clinician's judgment according to the tumor response and adverse events (AEs; grade 3 or 4 toxicity), as defined by the Common Terminology Criteria for Adverse Events v.3.0 [18]. The treatment continued until disease progression or treatment intolerance developed. The tumor response was measured for 4–12 weeks after the treatment initiation using the Response Evaluation Criteria in Solid Tumors v.1.1 criteria [19].

Baseline demographic and clinicopathological data were collected (Table 1); the pre- and post-treatment evaluations consisted of complete history taking and physical examination, complete blood count, liver and renal function tests, chest computed tomography (CT), abdominal and pelvis CT or magnetic resonance imaging, and total body bone scan. Fluorodeoxyglucose-positron emission tomography or positron emission tomography/CT scan were optional. During the treatment, all patients were evaluated according to the institutional protocol by their attending urologists, and follow-up visits were regularly conducted after the treatment termination until death.

The disease control rate was defined as the proportion of patients who achieved stable disease (SD), partial response (PR), or complete response (CR). Progression-free survival (PFS) was defined from the date of sorafenib initiation until documented radiologically confirmed disease progression or death. OS was defined from the date of sorafenib initiation until all-cause death. Continuous variables are summarized as medians and ranges, and categorical variables as proportions. Kaplan-Meier analyses were used for estimating PFS and OS. All statistical analyses were performed using STATA software (version 13.1, STATA Inc., TX, USA) by two medical statisticians (Nam BH, PhD and Kim SH, PhD).

## Ethical statement

All study protocols were conducted according to the ethical guidelines of the World Medical Association Declaration of Helsinki-Ethical Principles for Medical Research Involving Human Subjects [20]. This retrospective study was approved by the Institutional Review Board of the Research Institute and Hospital of National Cancer Center, Goyang, Korea (IRB No. NCCNCS 11–439) and the Institutional Review Boards of the 11 participating hospitals, including Seoul National University Bundang Hospital, SeongNam; Asan Medical Center, Seoul; Samsung Medical Center, Sungkyunkwan University School of Medicine, Seoul; Pusan National University Hospital, Busan; Seoul St. Mary's Hospital, Seoul; School of Medicine, Kyungpook National University, Daegu; Wonkwang University School of Medicine and Hospital; Kangbuk Samsung Hospital, Sungkyunkwan University School of Medicine, Seoul; Korea Cancer Center Hospital, Seoul; and Seoul National University Hospital, Seoul. The Institutional Review Boards of all 11 participating hospitals waived the need for written informed consent from the participants. All patient records/information were anonymized and de-identified prior to analysis in this study.

## Results

During a median follow-up of 17.2 months, the radiologically confirmed best objective response rate (ORR; CR+PR), disease-control rate (DCR; CR+PR+SD), and median PFS and OS times were 22.0%, 53.1%, and 6.4 and 32.6 months, respectively (Table 1). The corresponding values in the 116 first-line sorafenib patients were 23.2%, 56.0%, 7.4 months, and unreached (>31.1 months), respectively. For the 43 second-line and 18 third/fourth-line

**Table 1. Baseline characteristics (N = 177).**

| Parameter                                  | N (%) or median (range) |
|--------------------------------------------|-------------------------|
| Gender (male/female)                       | 136/41                  |
| Age (years)                                | 62.0±10.9               |
| Follow-up duration (months)                | 17.2 (0.2–63.8)         |
| Treatment duration (weeks)                 | 20 (1–216)              |
| Body mass index (kg/m <sup>2</sup> )       | 23.3 (14.5–37.2)        |
| <b>Comorbidity</b>                         |                         |
| Cerebrovascular accident                   | 5 (2.8)                 |
| Angina                                     | 2 (1.1)                 |
| Myocardial infarction                      | 4 (2.3)                 |
| Thrombosis/embolism                        | 1 (0.6)                 |
| Deep vein thrombosis                       | 1 (0.6)                 |
| Hypercholesterolemia                       | 3 (1.7)                 |
| Hyperlipidemia                             | 2 (1.1)                 |
| Body surface area (m <sup>2</sup> ) ≤1.7   | 74 (46.0)               |
| >1.7                                       | 87 (54.0)               |
| Unknown                                    | 16                      |
| Karnofsky performance score >80            | 107 (78.7)              |
| 50–80                                      | 22 (16.2)               |
| <50                                        | 7 (5.1)                 |
| Unknown                                    | 41                      |
| MSKCC risk criteria, Favorable             | 49 (35.0)               |
| Intermediate                               | 82 (58.6)               |
| Poor                                       | 9 (6.4)                 |
| Unknown                                    | 37                      |
| Heng risk criteria, Favorable              | 39 (28.7)               |
| Intermediate                               | 78 (57.3)               |
| Poor                                       | 19 (14.0)               |
| Unknown                                    | 41                      |
| <b>Prior surgical therapy</b>              |                         |
| Nephrectomy [radical/partial/embolization] | 150[135/5/10] (66.9)    |
| Metastasectomy                             | 27 (23.1)               |
| <b>Prior systemic therapy</b>              |                         |
| Immunotherapy                              | 56 (31.6)               |
| Chemotherapy                               | 33 (18.6)               |
| Targeted therapy (sunitinib)               | 4 (2.3)                 |
| Radiation therapy                          | 19 (10.7)               |
| Radiation therapy                          | 18 (10.2)               |
| Primary renal tumor in situ                | 32 (18.1)               |
| <b>Number of metastatic sites (organs)</b> |                         |
| 1 organ                                    | 3 (1–5)                 |
| 2 organs                                   | 94 (57.0)               |
| 3 organs                                   | 44 (26.7)               |
| 3 organs                                   | 19 (11.5)               |
| ≥4 organs                                  | 8 (4.8)                 |
| Unknown                                    | 12                      |
| <b>Metastatic sites</b>                    |                         |
| Brain                                      | 42 (23.7)               |
| Bone                                       | 38 (21.5)               |
| Liver                                      | 17 (9.6)                |

(Continued)

**Table 1.** (Continued)

| Parameter                                  | N (%) or median (range) |
|--------------------------------------------|-------------------------|
| Lung                                       | 124 (70.1)              |
| Lymph nodes                                | 34 (19.2)               |
| Pancreas                                   | 8 (4.5)                 |
| Kidney, contralateral                      | 7 (4.0)                 |
| Other                                      | 30 (16.9)               |
| Characteristics of primary renal tumor     | 8 (1–117)               |
| Size of primary tumor (cm)                 |                         |
| Collecting system invasion                 | 28 (15.8)               |
| Capsule invasion                           | 36 (20.3)               |
| Lymphovascular invasion                    | 34 (19.2)               |
| Tumor necrosis                             | 46 (26.0)               |
| TNM stage T1                               | 25 (14.1)               |
| T2                                         | 35 (19.8)               |
| T3                                         | 74 (41.8)               |
| T4                                         | 8 (4.5)                 |
| Tx                                         | 35 (19.8)               |
| N1                                         | 27 (15.3)               |
| M1                                         | 131 (74.0)              |
| Fuhrman grade 1                            | 5 (3.4)                 |
| 2                                          | 39 (26.2)               |
| 3                                          | 69 (46.2)               |
| 4                                          | 36 (24.2)               |
| Unknown                                    | 28                      |
| Histology, Clear cell, pure                | 159 (98.1)              |
| Non-clear cell                             | 3 (1.9)                 |
| Unknown                                    | 15                      |
| Best overall response (CR+PR+SD)           | 94 (53.1)               |
| Complete remission (CR)                    | 6 (3.4)                 |
| Partial response (PR)                      | 33 (18.6)               |
| Stable disease (SD)                        | 55 (31.1)               |
| Progressive disease                        | 83 (46.9)               |
| Progression-free survival (median, months) | 6.4 (5.2–8.9)           |
| Overall survival (median, months)          | 32.6 (27.3–63.8)        |
| Survival                                   | 89 (74.8)               |
| Cancer-specific death                      | 19 (16.0)               |

MSKCC, Memorial Sloan-Kettering Cancer Center; TNM, tumor-node-metastasis.

doi:10.1371/journal.pone.0135165.t001

patients, the DCRs were 46.5% (2.3+16.3+27.9%) and 38.9% (0+16.7+22.2%), respectively (Table 2, Fig 1).

In terms of the safety profile, 1595 AEs occurred among 112 (63.3%) patients during the median 20-week treatment duration; of these, 118 (7.4%) AEs  $\geq$  grade 3 in 64 (36.2%) patients, including one myocardial infarction, negatively affected the treatment tolerability (Table 2). Among these 64 patients, 40 (62.5%) received first-line sorafenib, with a  $\geq$  grade 3 AE rate of 6.8% observed (71/1048 AEs). The AEs  $\geq$  grade 3 included hand-foot syndrome (10.2%), anemia (5.6%), hypertension (4.0%), and serum lipase elevation (4.5%), with the most common AEs to cause discontinuation, reduction, or interruption of sorafenib being hand-foot skin

**Table 2. Description of  $\geq$  graded 3 adverse events during sorafenib treatment (N,%) (See also S1 Table, for more details).**

| Adverse event                      | First-line (N = 116) | Overall (N = 177) |
|------------------------------------|----------------------|-------------------|
| <b>Constitutional symptoms</b>     |                      |                   |
| Fatigue                            |                      | 2 (1.1)           |
| Weight loss                        |                      | 1 (0.6)           |
| <b>Gastrointestinal</b>            |                      |                   |
| Diarrhea                           | 1 (0.8)              | 4 (2.3)           |
| Vomiting                           | 1 (0.8)              | 1 (0.6)           |
| Anorexia                           | 3 (2.5)              | 4 (2.3)           |
| Heartburn                          | 1 (0.8)              | 1 (0.6)           |
| Dental problems                    | 1 (0.8)              | 1 (0.6)           |
| Mucositis/stomatitis               | 1 (0.8)              | 2 (1.1)           |
| <b>Dermatological</b>              |                      |                   |
| Rash/desquamation                  | 3 (2.5)              | 4 (2.3)           |
| Rash: hand-foot skin reaction      | 11 (9.2)             | 18(10.2)          |
| Dermal change                      | 2 (1.7)              | 2 (1.1)           |
| Alopecia                           | 1 (0.8)              | 2 (1.1)           |
| <b>Cardiac</b>                     |                      |                   |
| Hypertension                       | 1 (0.9)              | 7 (4.0)           |
| Cardiac ischemia/infarction        | 1 (0.9)              | 1 (0.6)           |
| <b>Pulmonary/upper respiratory</b> |                      |                   |
| Dyspnea                            | 1 (0.8)              | 1 (0.6)           |
| Voice changes                      | 1 (0.8)              | 2 (1.1)           |
| <b>Other</b>                       |                      |                   |
| Pain                               | 2 (1.7)              | 3 (1.7)           |
| <b>Hematologic</b>                 |                      |                   |
| Anemia                             | 8 (6.9)              | 10 (5.6)          |
| Lymphopenia                        | 3 (2.6)              | 3 (1.7)           |
| Neutrophil/granulocyte (ANC/AGC)   | 2 (1.7)              | 2 (1.1)           |
| <b>Non-hematologic</b>             |                      |                   |
| Elevated AST                       | 2 (1.7)              | 2 (1.1)           |
| Elevated ALT                       | 3 (2.6)              | 4 (2.3)           |
| Hyperbilirubinemia                 | 1 (0.9)              | 1 (0.6)           |
| Hypocalcemia                       | 1 (0.9)              | 2 (1.1)           |
| Elevated creatinine                | 3 (2.6)              | 3 (1.7)           |
| Hyperglycemia                      |                      | 3 (1.7)           |
| Elevated amylase                   | 2 (1.7)              | 5 (2.8)           |
| Elevated lipase                    | 4 (3.4)              | 8 (4.5)           |
| Hypophosphatemia                   | 9 (7.8)              | 14 (7.9)          |
| Hyperkalemia                       | 1 (0.9)              | 2 (1.1)           |
| Hyponatremia                       | 1 (0.8)              | 2 (1.1)           |
| Hyperuricemia                      |                      | 1 (0.6)           |
| <b>Total</b>                       | <b>71</b>            | <b>118</b>        |

ANC, absolute neutrophil count; AGC, absolute granulocyte count; AST, aspartate transaminase; ALT, alanine transaminase.

doi:10.1371/journal.pone.0135165.t002

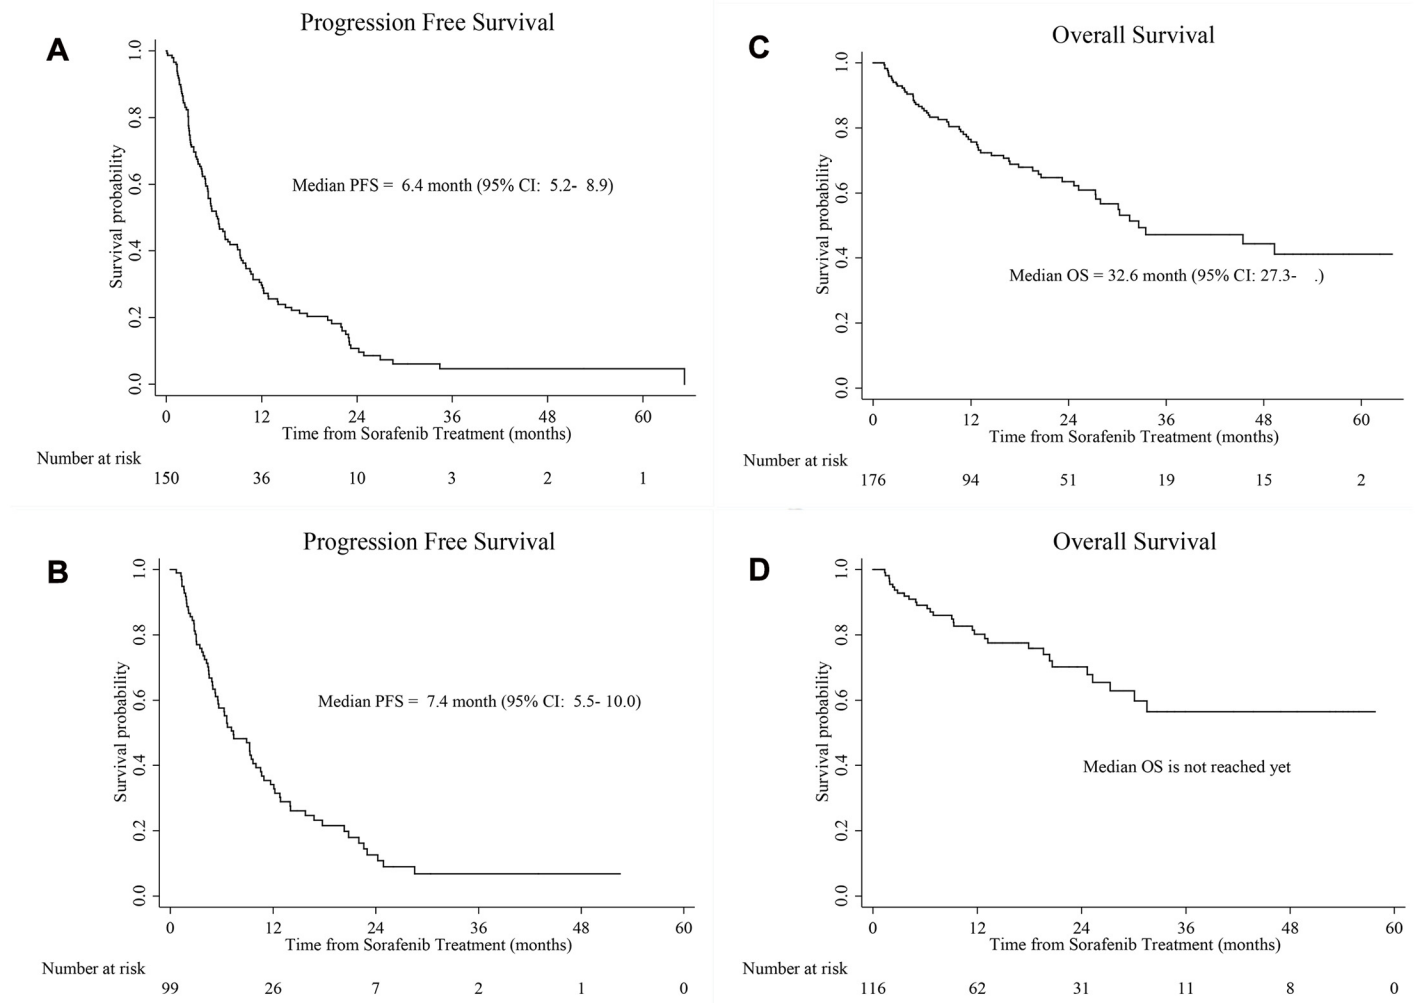

**Fig 1. Progression-free (PFS) and overall survivals (OS) for (A, C) all 177 patients and (B, D) 116 patients treated with first-line sorafenib, respectively.** CI, confidence interval.

doi:10.1371/journal.pone.0135165.g001

reaction (68.9%), general fatigue (55.1%), anorexia (44.8%), nausea (44.0%), anemia (42.2%), and rash (42.2%).

Among all 177 patients, 15 (8.5%), 40 (22.6%), and 12 (6.8%) patients required drug discontinuation, dose reduction, and drug interruption, respectively, for a median of 1.7 weeks due to severe AE or poor compliance, resulting in 18 (10.2%) patients stopping treatment (data not shown). For the first-line sorafenib group, during a median of 5.6 (range, 1.2–41.1) months of treatment, a daily dose of 800 mg of sorafenib was initiated in 116 patients, whereas 28 (24.1%) patients required dose reduction and 11 (9.5%) interrupted treatment due to severe AEs, with a median maximum duration of 1.7 (range, 0.7–18.2) months (Table 3). However, only 9 (7.8%) patients finally discontinued sorafenib due to severe AEs.

## Discussion

While the efficacy and safety of sorafenib for mRCC have been confirmed by an international collaborative study mostly comprising Western patients, which reported significant



**Table 3. Therapeutic responses to sorafenib according to the treatment line.**

| Category                              | Number (percentage) or median (min-max) |                             |                            |
|---------------------------------------|-----------------------------------------|-----------------------------|----------------------------|
|                                       | First-line (N = 116, 65.5%)             | Second-line (N = 43, 24.3%) | Third-line (N = 18, 10.2%) |
| Best overall response (CR+PR+SD)      | 65 (56.0)                               | 20 (46.5)                   | 7 (38.9)                   |
| Complete remission (CR)               | 4 (3.4)                                 | 1 (2.3)                     | 0 (0.0)                    |
| Partial response (PR)                 | 23 (19.8)                               | 7 (16.3)                    | 3 (16.7)                   |
| Stable disease (SD)                   | 38 (32.8)                               | 12 (27.9)                   | 4 (22.2)                   |
| Progressive disease                   | 38 (32.8)                               | 18 (41.9)                   | 4 (22.2)                   |
| Not evaluated                         | 13 (11.2)                               | 5 (11.6)                    | 7 (38.9)                   |
| Progression-free survival (months)    | 7.4 (5.5–10.5)                          | 5.2 (2.9–7.4)               | 2.9 (1.4–8.0)              |
| One-year progression-free survival    | 34.1 (24.2–44.3)                        | 22.6 (10.7–37.3)            | 12.5 (0.7–42.3)            |
| Overall survival (months)             | NR (1.0–31.1)                           | 27.4 (12.7–33.5)            | 16.0 (4.9–NR)              |
| One-year overall survival             | 80.2 (70.8–86.8)                        | 69.2 (51.9–81.3)            | 75.0 (31.5–93.1)           |
| Drug discontinuation                  | 69 (59.5)                               | 27 (62.8)                   | 5 (27.8)                   |
| Adverse events                        | 9 (13.0)                                | 1 (3.7)                     | 2 (40.0)                   |
| Poor compliance                       | 3 (4.3)                                 | 0 (0.0)                     | 0 (0.0)                    |
| Loss of follow-up                     | 5 (7.2)                                 | 3 (11.1)                    | 0 (0.0)                    |
| Disease progression                   | 43 (62.3)                               | 19 (70.4)                   | 3 (60.0)                   |
| Death                                 | 6 (8.7)                                 | 1 (3.7)                     | 0 (0.0)                    |
| Other                                 | 3 (4.3)                                 | 3 (11.1)                    | 0 (0.0)                    |
| Dose reduction                        | 41 (35.3)                               | 4 (9.3)                     | 1 (5.6)                    |
| Adverse event                         | 28 (68.3)                               | 4 (100.0)                   | 0 (0.0)                    |
| Poor compliance                       | 7 (17.1)                                | 0 (0.0)                     | 1 (100.0)                  |
| Other                                 | 6 (14.6)                                | 0 (0.0)                     | 0 (0.0)                    |
| Dose interruption                     | 16 (13.8)                               | 3 (7.0)                     | 1 (5.6)                    |
| Adverse event                         | 11 (68.8)                               | 1 (33.3)                    | 0 (0.0)                    |
| Other                                 | 5 (31.3)                                | 2 (66.7)                    | 1 (100.0)                  |
| Duration of dose interruption (weeks) | 1.4 (0.7–78)                            | 2.1 (1.6–3)                 | 2 (2–2)                    |

NR, not reached yet.

doi:10.1371/journal.pone.0135165.t003

improvements in the PFS and OS and an acceptable tolerability with multiple AEs [21], the efficacy and safety of sorafenib in Asian populations remain unclear. Further, no Korean study on sorafenib in mRCC patients with/without prior systemic therapy currently exists, with the exception of some small single-center studies [22, 23]. The current retrospective multicenter study comprising 11 Korean academic hospitals revealed the efficacy and safety of sorafenib treatments as first-, second-, and third-line therapy in a representative set of Korean patients with mRCC.

In this study, the ORR, DCR, PFS, and OS were 22.0%, 51.1%, and 6.4 and 32.6 months, respectively (Table 1). Comparison of the sorafenib responses between patients with prior immunotherapy or other systemic therapy, and those without prior systemic therapy showed that the immunotherapy group tended to have slightly worse PFS (5.3 vs. 6.6 months,  $p = 0.863$ ) and OS (27.4 vs. 33.5 months,  $p = 0.230$ ), although these differences were not statistically significant (Fig 2).

Moreover, compared to previous Western [3, 4, 6], Asia-Pacific [15], and Japanese and Chinese studies [24, 25], our study showed similar or better PFS and OS, and better ORR (22.0%) than the Western studies, and similar or lower response rates and prognoses than the adjacent Asia-Pacific countries (Table 4). However, the DCR of this study (51.1%) was worse than that



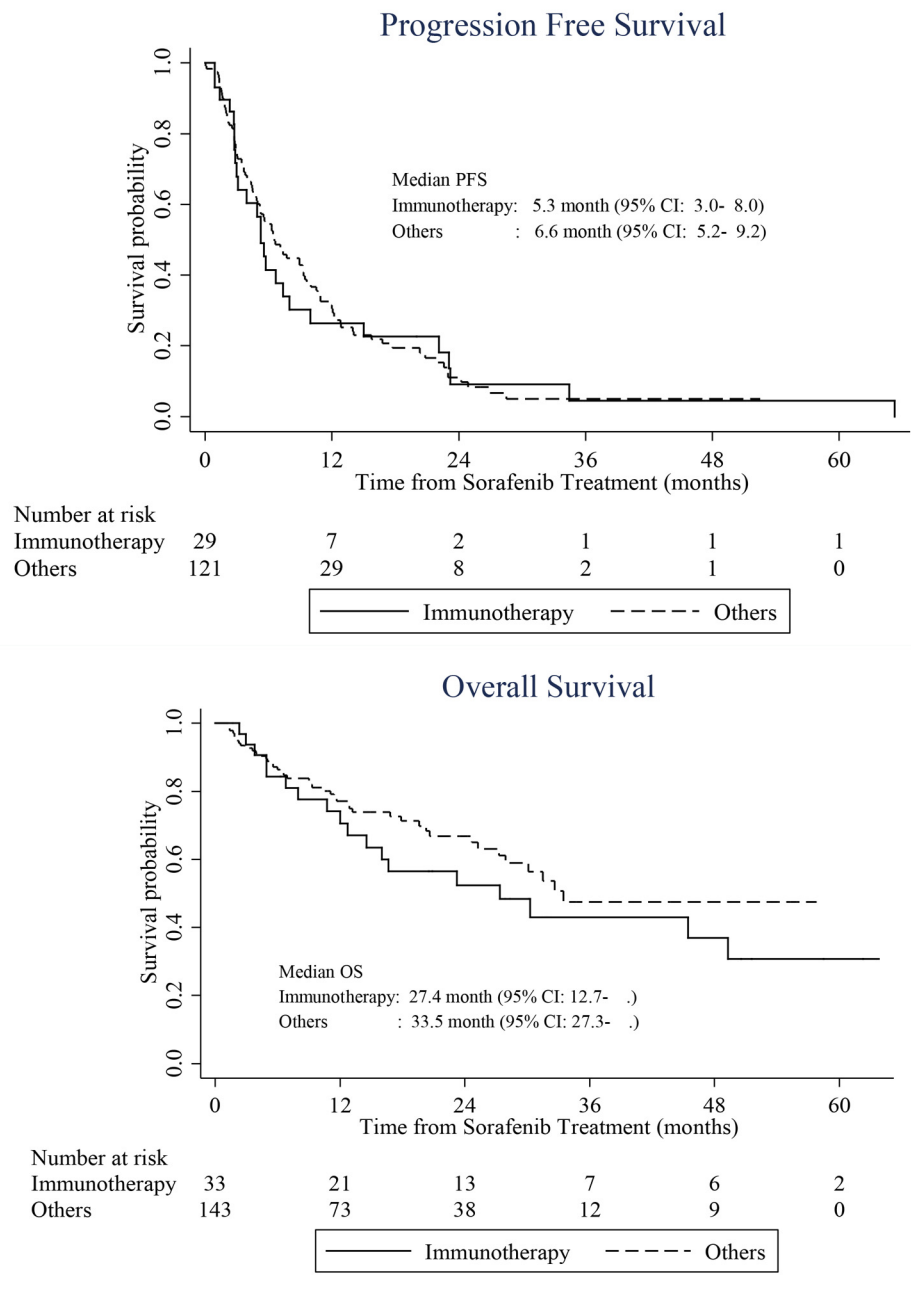

**Fig 2. Comparison of progression-free (PFS) and overall survivals (OS) after sorafenib treatment between immunotherapy-refractory (N = 33) and non-immunotherapy patients (N = 144).** CI, confidence interval.

doi:10.1371/journal.pone.0135165.g002

in both the previous Western and Asia-Pacific trials, likely owing to the fact that all non-evaluated patients in this study were presumed progressed when the overall best response of sorafenib was assessed. However, other Japanese studies showed similar efficacies of sorafenib to ours [25–28].

**Table 4. Comparison of studies using sorafenib in advanced renal cell carcinoma from Korea and other nations, including Japan, China, and Western countries.**

| Study name/location (reference number) | Prior cytokine use (%) | Objective response rate (%) | Disease control rate (%) | Median PFS (months)     | Median OS (months)      |
|----------------------------------------|------------------------|-----------------------------|--------------------------|-------------------------|-------------------------|
| This study                             | 18.6                   | 22.0                        | 53.1                     | 6.4                     | 32.6                    |
| Korea (23, 41)                         | 12–29                  | 24–30                       | 60–71                    | 8.6                     | 25.7                    |
| TARGET (3)                             | 100                    | 10.2                        | 84.0                     | 5.5 (24weeks)           | 17.8 (78weeks)          |
| EU-ARCCS (4)                           | 67                     | 4                           | 85                       | 6.6 (28.3weeks)         | NE                      |
| NA-ARCCs (6)                           | 50                     | 4                           | 84                       | 5.6 (24weeks)           | 11.7 (50weeks)          |
| PREDICT (15)                           | 41.0                   | 23.3                        | 70.3                     | 7.3                     | NE                      |
| AXIS II (34)                           | 35                     | 3.4–9.4                     | 58.6–63.8                | 4.7–4.9                 | NE                      |
| China (9, 10)                          | 39.7–45.5              | 16.7–24.5                   | 80.0–87.8                | 14–15 (40weeks)         | 16.0–16.1 (69 week)     |
| China (8, 10)                          | 82.2–91.9              | 21.0–36.6                   | 84.2–88.1                | 9.6–9.7(41-45weeks)     | NE                      |
| Japan (8)                              | 50–60                  | 19.4–21.8                   | 52.0–73.6                | 7.3–12.2                | 11.9–32.5               |
| Western trials (15, 32, 33)            | 50–100                 | 4–10.2                      | 84–85                    | 5.5–6.6 (24–28.3 weeks) | 11.7–17.8 (50–76 weeks) |

OS, overall survival; PFS, progression-free survival; NE, not evaluated.

doi:10.1371/journal.pone.0135165.t004

The better efficacy and clinical outcomes of sorafenib in Asian compared to Western patients with mRCC has already been reported [7, 10]. The potential reasons for these differential outcomes include ethnic differences, including differential expressions of tumor markers and molecular features, as has been previously demonstrated in other malignancies [10]. Furthermore, the patient characteristics differed between each study, with our study having a relatively small portion of immunotherapy-refractory patients (18.6%) and more patients with advanced disease (median, three metastatic sites).

Another interesting point of this study was that the failed immunotherapy patients (N = 33) had worse PFS (5.3 months) and OS (27.4 months) than other patients (N = 144; PFS, 6.6 months; OS, 33.5 months) (Fig 2). This is likely because 80.6% (N = 116) of the non-immunotherapeutic patients were treatment-naïve mRCC patients who received sunitinib and sorafenib as first- or second-line therapy, thereby resulting in better clinical outcomes. Similarly, other comparative studies also reported that the sorafenib efficacy in advanced RCC with prior cytokine therapy was similar or tended to be slightly decreased compared to advanced RCC without prior cytokine therapy but with other TTs [4, 7, 10, 29, 30], and this is why sorafenib is now used for first- and second-line therapy for advanced RCC rather than cytokine therapy.

As for the outcomes in the first-line setting in mRCC patients (N = 116), the ORR, DCR, PFS, and OS were 23.2%, 56.0%, 7.4 months, and unavailable (censored at 30.1 months), respectively (Table 2). Escudier et al., in their randomized phase II trial comparing first-line sorafenib to interferon-alpha therapy, reported median PFSs of 5.6 and 5.7 months, respectively [31]. Further, in the PREDICT study, first-line sorafenib was associated with a median PFS of 7.6 months, without available OS data [15], similar to in our study.

Western studies have reported ORRs, PFSs, and OSs of 4–10.2%, 5–6 months, and 11.7–17.8 months, respectively [3, 4, 6, 31], and another recent sorafenib comparison study with the third-generation tyrosine kinase inhibitor tivozanib showed PFS and OS of 9.1 and 29.3 months, respectively in the sorafenib group, which were better than the results of our and previous studies [32]. This difference likely results from differences in the enrolled patients. The tivozanib trial comprised mRCC patients from East-Europe with performance statuses of 1 and 2, who all underwent nephrectomy, had no prior immunochemotherapy, and had confirmed clear cell pathology.

Compared to other studies from Asia, with similar ethnic populations as Korea, the Japanese experiences of sorafenib as first-line therapy were similar to ours, in which the DCR reached 46–59.9%, ORR 21.8–22%, and PFS 7.9–9 months [25, 26]. However, in Chinese studies, better or similar responses were reported, with radiologically confirmed DCRs of 21.0–24.5%, DCR of 87.8% (CR+PR+SD>4 months), median PFS of 60 weeks, and unreached median OS until 76 weeks' follow-up [9, 10].

The use of sorafenib as second- (N = 43) and third-line (N = 12) therapies for mRCC patients with prior systemic history was associated with ORR, DCR, PFS, and OS of 18.6%, 44.5%, 5.2 months, and 27.4 months, and 16.7%, 50.0% (without CR), 2.9 months, and 16.0 months, respectively (Table 2). The previous second- and third-line sorafenib studies showed an ORR of 10.1%, with PFS and OS of 3.9–4.8 and 16.6–19.2 months, respectively, for second-line sorafenib, and a PR rate of 4% and PFS of 3.6 months for third-line TT [13, 33].

Among the 43 patients treated with second-line sorafenib, those undergoing prior immunotherapy (N = 23) had better PFS and OS than patients with prior sunitinib history (N = 17; 5.6 [0.6–3.1] and 27.4 months for immunotherapy, and 3.5 [1.5–7.7] and 12.9 months for sunitinib therapy, respectively; data not shown). These results were similar to those of the AXIS phase 3 trial, with median PFSs of 6.5–6.6 and 2.8–3.4 months for the cytokine and sunitinib groups, respectively [34].

Compared with our study, it might be concluded that similar best overall responses and prognoses, including PFS and OS, were achieved in Asian mRCC patients treated with sorafenib in the first-, second-, and third-line settings, whereas the efficacy was poorer in Western patients [24–26], suggesting that ethnicity-related differences in the genetic profiles, tumor marker expressions, and molecular features, as well as differences in body composition, are important factors for therapeutic efficacy [35, 36]. Accordingly, previous studies on mRCC and other malignancies have indicated that Asian mRCC patients have better clinical outcomes compared with Western patients [7, 10]. Furthermore, molecular targeting studies have also shown different efficacies among patients of different ethnicities and with different cancer types [7]. Whether these differences are induced by genetic and molecular factors remains unknown; however, it is reasonable to postulate that genetic differences in the tumor cells play important roles in determining the differences in the disease phenotype.

As mentioned above, another potential explanation for the different efficacies and safety profiles observed between different ethnicities might be differences in the body composition, such as the body surface area. These differences, together with genetic factors might explain the longer median survival time of Japanese mRCC patients compared to North American or European patients in the cytokine era [35, 37]. Differences in the sorafenib concentrated volume and maintenance doses, as assessed by expression of tumor markers and molecular features, in patients from different ethnic groups with different body sizes have been well documented for many malignancies from different organs, and numerous studies have shown the importance of body shape as a risk factor for the therapeutic efficacy of cancer therapy and prognosis [35, 38].

Van der Veld et al. showed that severe AEs (causing dose reductions or permanent discontinuation) highly correlated with low body surface area [35]. Asians have significantly smaller body volume than Western populations, and some Japanese studies have suggested an optimal dose of 600 mg for Japanese patients, with maintenance of at least half the dose for the first month of therapy [26, 34]. This might also be the reason for the higher rates of AEs and therapeutic interruption in Asian studies, including this study, compared to in Western studies [35, 36, 39].

In this study, in the first-line sorafenib setting, 28 (24.1%) patients required dose reduction, 11 (9.5%) required interruption, and 9 (7.8%) required treatment discontinuation due to AEs,

which were higher than the rates in Western studies such as the TARGET and European SHARP studies (28%) [3, 40, 41] (Table 3). Asian (particularly Korean, Japanese, and Chinese) patients are more prone to certain AEs, especially hand-foot skin reaction (67.2% in this study and 55–88.1% in previous Japanese and Chinese reports) [9, 24] compared to Western patients (10–20%) (3, 4). Three large first-line sorafenib studies also showed an incidence of hand-foot skin reaction  $\geq$  grade 3 of 0.4–1.3% in Western patients [3, 9, 24], which was lower than the corresponding rates in Asian patients (9.2–13.5%), including those in our study (9.2%).

Finally, there were some limitations of this study, including the potential selection bias associated with retrospective analyses, incomplete data collection, and heterogeneity in the clinicians' experiences of dose modification. Further investigations into the efficacy of sorafenib, as well as into its prognostic factors and toxicity profiles, are needed in Korea. It is crucial to establish new strategies to allow patients to receive continuous treatment without sacrificing either the efficacy or their quality of life.

## Conclusion

This study showed the efficacy and a tolerable safety of sorafenib in Korean mRCC patients as compared to that reported in other countries.

## Supporting Information

**S1 Table. An overall description of adverse events during sorafenib treatment was added in a supplementary file.**  
(DOCX)

## Author Contributions

Conceived and designed the experiments: CSK JC. Performed the experiments: SEL CSK IYS TNK SHH TGK SIS KJJ KS CK JC. Analyzed the data: SHK BHN SK. Contributed reagents/materials/analysis tools: SEL CSK IYS TNK SHH TGK SIS KJJ KS CK JC. Wrote the paper: SHK JC.

## References

1. Law TM, Motzer RJ, Mazumdar M, Sell KW, Walthers PJ, O'Connell M, et al. Phase III randomized trial of interleukin-2 with or without lymphokine-activated killer cells in the treatment of patients with advanced renal cell carcinoma. *Cancer*. 1995 Sep 1; 76(5):824–32. PMID: [8625186](#). Epub 1995/09/01. eng.
2. Rini BI, Campbell SC, Escudier B. Renal cell carcinoma. *Lancet*. 2009 Mar 28; 373(9669):1119–32. PMID: [19269025](#). Epub 2009/03/10. eng. doi: [10.1016/S0140-6736\(09\)60229-4](#)
3. Escudier B, Eisen T, Stadler WM, Szczylik C, Oudard S, Siebels M, et al. Sorafenib in advanced clear-cell renal-cell carcinoma. *N Engl J Med*. 2007 Jan 11; 356(2):125–34. PMID: [17215530](#).
4. Beck J, Procopio G, Bajetta E, Keilholz U, Negrier S, Szczylik C, et al. Final results of the European Advanced Renal Cell Carcinoma Sorafenib (EU-ARCCS) expanded-access study: a large open-label study in diverse community settings. *Ann Oncol*. 2011 Aug; 22(8):1812–23. PMID: [21324953](#). Epub 2011/02/18. eng. doi: [10.1093/annonc/mdq651](#)
5. Cho IC, Chung J. Current status of targeted therapy for advanced renal cell carcinoma. *Korean journal of urology*. 2012 Apr; 53(4):217–28. PMID: [22536463](#). Pubmed Central PMCID: PMC3332131. Epub 2012/04/27. eng. doi: [10.4111/kju.2012.53.4.217](#)
6. Stadler WM, Figlin RA, McDermott DF, Dutcher JP, Knox JJ, Miller WH Jr., et al. Safety and efficacy results of the advanced renal cell carcinoma sorafenib expanded access program in North America. *Cancer*. 2010 Mar 1; 116(5):1272–80. PMID: [20082451](#). Epub 2010/01/19. eng. doi: [10.1002/cncr.24864](#)
7. Cheng AL, Kang YK, Chen Z, Tsao CJ, Qin S, Kim JS, et al. Efficacy and safety of sorafenib in patients in the Asia-Pacific region with advanced hepatocellular carcinoma: a phase III randomised, double-

- blind, placebo-controlled trial. *The Lancet Oncology*. 2009 Jan; 10(1):25–34. PMID: [19095497](#). Epub 2008/12/20. eng. doi: [10.1016/S1470-2045\(08\)70285-7](#)
8. Ye D, Eto M, Chung JS, Kimura G, Chang WC, Chang YH, et al. Use of targeted therapies for advanced renal cell carcinoma in the Asia-Pacific region: opinion statement from China, Japan, Taiwan, Korea, and Australia. *Clinical genitourinary cancer*. 2014 Aug; 12(4):225–33. PMID: [24630778](#). Epub 2014/03/19. eng. doi: [10.1016/j.clgc.2014.01.007](#)
  9. Zhang H, Dong B, Lu JJ, Yao X, Zhang S, Dai B, et al. Efficacy of sorafenib on metastatic renal cell carcinoma in Asian patients: results from a multicenter study. *BMC Cancer*. 2009; 9:249. PMID: [19622166](#). Pubmed Central PMCID: PMC2724546. Epub 2009/07/23. eng. doi: [10.1186/1471-2407-9-249](#)
  10. Ye DW, Zhang HL. Critical appraisal of sorafenib in the treatment of Chinese patients with renal cell carcinoma. *Onco Targets Ther*. 2014; 7:925–35. PMID: [24944516](#). Pubmed Central PMCID: PMC4057324. Epub 2014/06/20. eng. doi: [10.2147/OTT.S41828](#)
  11. Escudier B, Michaelson MD, Motzer RJ, Hutson TE, Clark JI, Lim HY, et al. Axitinib versus sorafenib in advanced renal cell carcinoma: subanalyses by prior therapy from a randomised phase III trial. *British journal of cancer*. 2014 Jun 10; 110(12):2821–8. PMID: [24823696](#). Pubmed Central PMCID: PMC4056058. Epub 2014/05/16. eng. doi: [10.1038/bjc.2014.244](#)
  12. Hutson TE, Escudier B, Esteban E, Bjarnason GA, Lim HY, Pittman KB, et al. Randomized phase III trial of temsirolimus versus sorafenib as second-line therapy after sunitinib in patients with metastatic renal cell carcinoma. *Journal of clinical oncology: official journal of the American Society of Clinical Oncology*. 2014 Mar 10; 32(8):760–7. PMID: [24297950](#). Epub 2013/12/04. eng.
  13. Motzer RJ, Porta C, Vogelzang NJ, Sternberg CN, Szczylik C, Zolnierek J, et al. Dovitinib versus sorafenib for third-line targeted treatment of patients with metastatic renal cell carcinoma: an open-label, randomised phase 3 trial. *The Lancet Oncology*. 2014 Mar; 15(3):286–96. PMID: [24556040](#). Epub 2014/02/22. eng. doi: [10.1016/S1470-2045\(14\)70030-0](#)
  14. Procopio G, Derosa L, Gernone A, Morelli F, Sava T, Zustovich F, et al. Sorafenib as first- or second-line therapy in patients with metastatic renal cell carcinoma in a community setting. *Future oncology (London, England)*. 2014 Aug; 10(10):1741–50. PMID: [24641206](#). Epub 2014/03/20. eng.
  15. Jager D, Ma JH, Mardiak J, Ye DW, Korbenfeld E, Zemanova M, et al. Sorafenib Treatment of Advanced Renal Cell Carcinoma Patients in Daily Practice: The Large International PREDICT Study. *Clinical genitourinary cancer*. 2014 Aug 23. PMID: [25444666](#). Epub 2014/12/03. Eng.
  16. Park K, Lee JL, Park I, Park S, Ahn Y, Ahn JH, et al. Comparative efficacy of vascular endothelial growth factor (VEGF) tyrosine kinase inhibitor (TKI) and mammalian target of rapamycin (mTOR) inhibitor as second-line therapy in patients with metastatic renal cell carcinoma after the failure of first-line VEGF TKI. *Medical oncology (Northwood, London, England)*. 2012 Dec; 29(5):3291–7. PMID: [22460837](#). Epub 2012/03/31. eng.
  17. Kane RC, Farrell AT, Saber H, Tang S, Williams G, Jee JM, et al. Sorafenib for the treatment of advanced renal cell carcinoma. *Clinical cancer research: an official journal of the American Association for Cancer Research*. 2006 Dec 15; 12(24):7271–8. PMID: [17189398](#). Epub 2006/12/26. eng.
  18. Trotti A, Colevas AD, Setser A, Rusch V, Jaques D, Budach V, et al. CTCAE v3.0: development of a comprehensive grading system for the adverse effects of cancer treatment. *Semin Radiat Oncol*. 2003 Jul; 13(3):176–81. PMID: [12903007](#). Epub 2003/08/07. eng.
  19. Eisenhauer EA, Therasse P, Bogaerts J, Schwartz LH, Sargent D, Ford R, et al. New response evaluation criteria in solid tumours: revised RECIST guideline (version 1.1). *Eur J Cancer*. 2009 Jan; 45(2):228–47. PMID: [19097774](#). doi: [10.1016/j.ejca.2008.10.026](#)
  20. World Medical Association Declaration of Helsinki: ethical principles for medical research involving human subjects. *Jama*. 2013 Nov 27; 310(20):2191–4. PMID: [24141714](#). Epub 2013/10/22. eng. doi: [10.1001/jama.2013.281053](#)
  21. Wilhelm SM, Carter C, Tang L, Wilkie D, McNabola A, Rong H, et al. BAY 43–9006 exhibits broad spectrum oral antitumor activity and targets the RAF/MEK/ERK pathway and receptor tyrosine kinases involved in tumor progression and angiogenesis. *Cancer Res*. 2004 Oct 1; 64(19):7099–109. PMID: [15466206](#). Epub 2004/10/07. eng.
  22. Kim HS, Hong MH, Kim K, Shin SJ, Ahn JB, Jeung HC, et al. Sunitinib for Asian patients with advanced renal cell carcinoma: a comparable efficacy with different toxicity profiles. *Oncology*. 2011; 80(5–6):395–405. PMID: [21829041](#). Epub 2011/08/11. eng. doi: [10.1159/000330361](#)
  23. Park SJ, Lee JL, Park I, Park K, Ahn Y, Ahn JH, et al. Comparative efficacy of sunitinib versus sorafenib as first-line treatment for patients with metastatic renal cell carcinoma. *Chemotherapy*. 2012; 58(6):468–74. PMID: [23548259](#). Epub 2013/04/04. eng. doi: [10.1159/000346484](#)

24. Akaza H, Tsukamoto T, Murai M, Nakajima K, Naito S. Phase II study to investigate the efficacy, safety, and pharmacokinetics of sorafenib in Japanese patients with advanced renal cell carcinoma. *Jpn J Clin Oncol*. 2007 Oct; 37(10):755–62. PMID: [17951335](#).
25. Ueda T, Imamura Y, Komaru A, Fukasawa S, Sazuka T, Suyama T, et al. Treatment outcomes of sorafenib for first line or cytokinerefractory advanced renal cell carcinoma in Japanese patients. *Int J Urol*. 2010 Sep; 17(9):811–5. PMID: [20649824](#). doi: [10.1111/j.1442-2042.2010.02604.x](#)
26. Tanigawa G, Kawashima A, Yamaguchi S, Nishimura K, Miyoshi S, Kajikawa J, et al. Clinical outcome and prognostic factors of sorafenib in Japanese patients with advanced renal cell carcinoma in general clinical practice. *Jpn J Clin Oncol*. 2011 Nov; 41(11):1265–70. PMID: [21965163](#). Epub 2011/10/04. eng. doi: [10.1093/jco/hyr137](#)
27. Tomita Y, Shinohara N, Yuasa T, Fujimoto H, Niwakawa M, Mugiya S, et al. Overall survival and updated results from a phase II study of sunitinib in Japanese patients with metastatic renal cell carcinoma. *Jpn J Clin Oncol*. 2010 Dec; 40(12):1166–72. PMID: [20713418](#). Epub 2010/08/18. eng. doi: [10.1093/jco/hyq146](#)
28. Uemura H, Shinohara N, Yuasa T, Tomita Y, Fujimoto H, Niwakawa M, et al. A phase II study of sunitinib in Japanese patients with metastatic renal cell carcinoma: insights into the treatment, efficacy and safety. *Jpn J Clin Oncol*. 2010 Mar; 40(3):194–202. PMID: [19897852](#). Epub 2009/11/10. eng. doi: [10.1093/jco/hyp146](#)
29. Heng DY, Signorovitch J, Swallow E, Li N, Zhong Y, Qin P, et al. Comparative Effectiveness of Second-Line Targeted Therapies for Metastatic Renal Cell Carcinoma: A Systematic Review and Meta-Analysis of Real-World Observational Studies. *PLoS one*. 2014; 9(12):e114264. PMID: [25493562](#). Pubmed Central PMCID: PMC4262396. Epub 2014/12/11. Eng. doi: [10.1371/journal.pone.0114264](#)
30. Naito S, Tomita Y, Rha SY, Uemura H, Oya M, Song HZ, et al. Kidney Cancer Working Group report. *Jpn J Clin Oncol*. 2010 Sep; 40 Suppl 1:i51–6. PMID: [20870920](#). Epub 2010/10/05. eng. doi: [10.1093/jco/hyq127](#)
31. Escudier B, Szczylik C, Hutson TE, Demkow T, Staehler M, Rolland F, et al. Randomized phase II trial of first-line treatment with sorafenib versus interferon Alfa-2a in patients with metastatic renal cell carcinoma. *Journal of clinical oncology: official journal of the American Society of Clinical Oncology*. 2009 Mar 10; 27(8):1280–9. PMID: [19171708](#). Epub 2009/01/28. eng.
32. Motzer RJ, Nosov D, Eisen T, Bondarenko I, Lesovoy V, Lipatov O, et al. Tivozanib versus sorafenib as initial targeted therapy for patients with metastatic renal cell carcinoma: results from a phase III trial. *Journal of clinical oncology: official journal of the American Society of Clinical Oncology*. 2013 Oct 20; 31(30):3791–9. PMID: [24019545](#). Epub 2013/09/11. eng.
33. Motzer RJ, Escudier B, Tomczak P, Hutson TE, Michaelson MD, Negrier S, et al. Axitinib versus sorafenib as second-line treatment for advanced renal cell carcinoma: overall survival analysis and updated results from a randomised phase 3 trial. *The Lancet Oncology*. 2013 May; 14(6):552–62. PMID: [23598172](#). Epub 2013/04/20. eng. doi: [10.1016/S1470-2045\(13\)70093-7](#)
34. Ueda T, Uemura H, Tomita Y, Tsukamoto T, Kanayama H, Shinohara N, et al. Efficacy and safety of axitinib versus sorafenib in metastatic renal cell carcinoma: subgroup analysis of Japanese patients from the global randomized Phase 3 AXIS trial. *Jpn J Clin Oncol*. 2013 Jun; 43(6):616–28. PMID: [23630366](#). Pubmed Central PMCID: PMC3664320. Epub 2013/05/01. eng. doi: [10.1093/jco/hyt054](#)
35. van der Veldt AA, Boven E, Helgason HH, van Wouwe M, Berkhof J, de Gast G, et al. Predictive factors for severe toxicity of sunitinib in unselected patients with advanced renal cell cancer. *British journal of cancer*. 2008 Jul 22; 99(2):259–65. PMID: [18594533](#). Pubmed Central PMCID: PMC2480961. Epub 2008/07/03. eng. doi: [10.1038/sj.bjc.6604456](#)
36. Ward E, Jemal A, Cokkinides V, Singh GK, Cardinez C, Ghafoor A, et al. Cancer disparities by race/ethnicity and socioeconomic status. *CA Cancer J Clin*. 2004 Mar-Apr; 54(2):78–93. PMID: [15061598](#). Epub 2004/04/06. eng.
37. Naito S, Yamamoto N, Takayama T, Muramoto M, Shinohara N, Nishiyama K, et al. Prognosis of Japanese metastatic renal cell carcinoma patients in the cytokine era: a cooperative group report of 1463 patients. *Eur Urol*. 2010 Feb; 57(2):317–25. PMID: [19136199](#). doi: [10.1016/j.eururo.2008.12.026](#)
38. Saijo N. The role of pharmacoethnicity in the development of cytotoxic and molecular targeted drugs in oncology. *Yonsei Med J*. 2013 Jan 1; 54(1):1–14. PMID: [23225792](#). Pubmed Central PMCID: PMC3521281. Epub 2012/12/12. eng. doi: [10.3349/ymj.2013.54.1.1](#)
39. Chen P, Aldape K, Wiencke JK, Kelsey KT, Miike R, Davis RL, et al. Ethnicity delineates different genetic pathways in malignant glioma. *Cancer Res*. 2001 May 15; 61(10):3949–54. PMID: [11358811](#).
40. Llovet JM, Ricci S, Mazzaferro V, Hilgard P, Gane E, Blanc JF, et al. Sorafenib in advanced hepatocellular carcinoma. *N Engl J Med*. 2008 Jul 24; 359(4):378–90. PMID: [18650514](#). doi: [10.1056/NEJMoa0708857](#)

41. Lee JL, Park I, Park K, Park S, Ahn Y, Ahn JH, et al. Efficacy and safety of vascular endothelial growth factor receptor tyrosine kinase inhibitors in patients with metastatic renal cell carcinoma and poor risk features. *Journal of cancer research and clinical oncology*. 2012 Apr; 138(4):687–93. PMID: [22237457](#). Epub 2012/01/13. eng. doi: [10.1007/s00432-012-1148-8](#)
